# Supplementary material for: Step-wedge cluster-randomised community-based trials: An application to the study of the impact of community health insurance
Source: PubMed Central journal article supplement (PMC2583992; doi:10.1186/1478-4505-6-10), 2008-10-22
Supplement: 1478-4505-6-10-S1.pdf [file 1478-4505-6-10-S1.pdf]

Household survey data set: all: 777 households  
Income < 10000 deleted: 717 households  
(1 household with income=15476750 was deleted)

### Results of linear regression

$$Y_{ij} = \alpha_i + \varepsilon_{ij} \quad \begin{array}{l} i=1,\dots,25 \text{ (k= 25 villages and respective sectors in Nouna town)} \\ j=1,\dots, i_j \text{ (ca. } i_j = 20\text{-}58 \text{ households)} \end{array}$$

$$\rho = \frac{ms_b - ms_w}{ms_b + (m_0 - 1)ms_w}$$

$\rho$  = intra class correlation coefficient

$R^{*2}$  = reliability coefficient

$m_0$  = mean cluster size (here  $m_0 = 31$  = mean number of households per village)

$ms_b$  and  $ms_w$  = mean square errors between and within cluster from standard ANOVA

|        | Y-Variable                                                                  | data set             | $R^{*2}$ | $\rho$  |
|--------|-----------------------------------------------------------------------------|----------------------|----------|---------|
| 1      | Income                                                                      | < 10000 delete       | 0.09     | 0.066   |
| 2      | Income                                                                      | All                  | 0.09     | 0.06    |
| 3      | Log (10) [income]                                                           | < 10000 delete       | 0.09     | 0.069   |
| 4      | Log (10) [income+1]                                                         | All                  | 0.07     | 0.04    |
| 5      | Income/household size                                                       | < 10000 delete       | 0.09     | 0.066   |
| 6      | Log (10) [income+1]/household size                                          | All                  | 0.05     | 0.022   |
| 7      | Total number of people in HH reporting at least fair health /household size | All                  | 0.05     | 0.0186  |
| 8      | Total household expenditure on drugs                                        | all , only: 290 HH   | 0.08     | -0.0075 |
| 9      | Log(10)[Drugs+1]                                                            | all , only: 290 HH   | 0.13     | 0.054   |
|        |                                                                             |                      |          |         |
| 10     | Log (10) [Income+1]/household size                                          | rural: 453 HH        | 0.03     | -0.0068 |
|        | Stratified rural/urban                                                      | all<br>urban: 287 HH | 0.04     | 0.017   |
| mean   |                                                                             |                      |          | 0.036   |
| median |                                                                             |                      |          | 0.04    |
